# Supplementary material
Source: MDPI journal article supplement (https://www.mdpi.com/2571-8789/8/1/10)
Supplement: s1 [file s1]

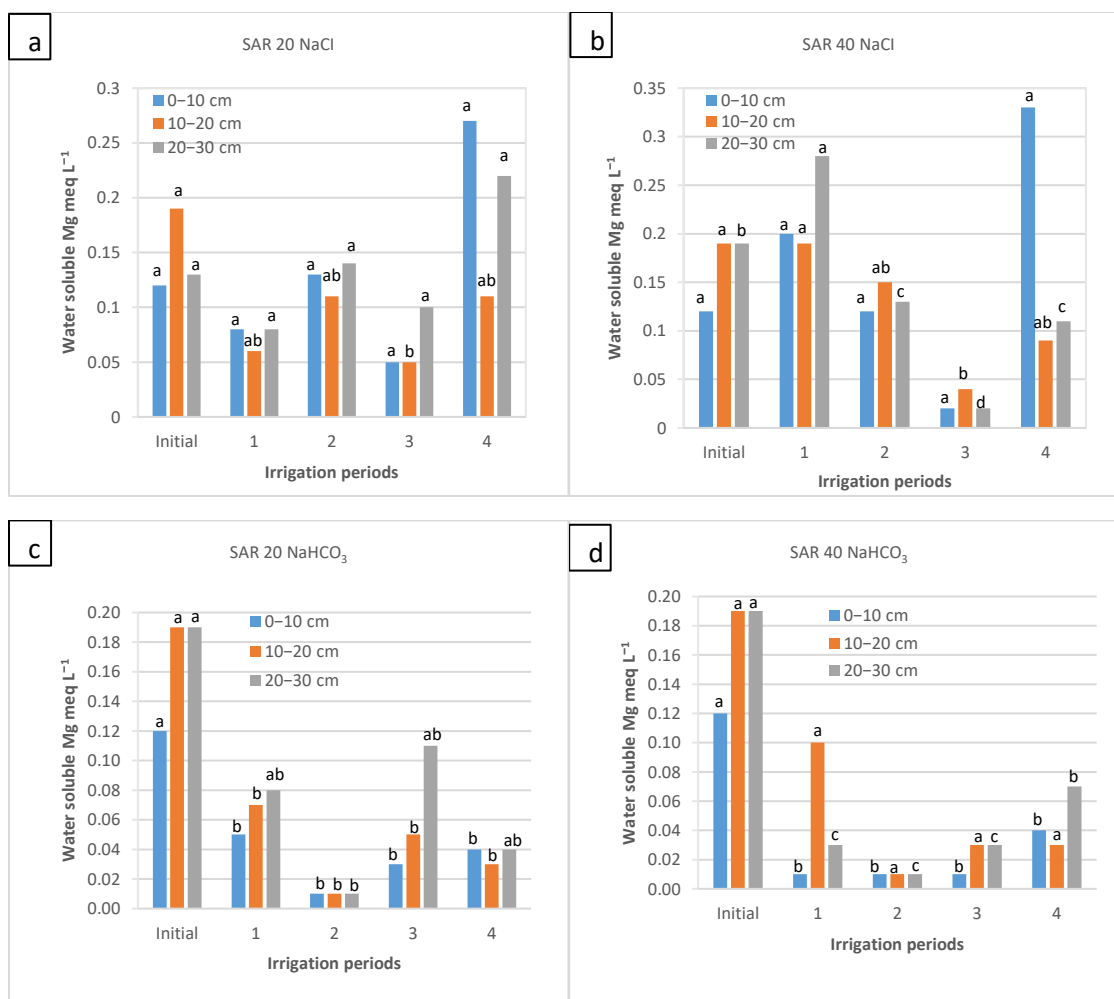

**Supplementary Figure 1.** Water-soluble  $Mg^{2+}$  of soil as a function of irrigation water applications during the irrigation periods (1, 2, and 4) and the rainy period (3) for four water qualities: (a) NaCl water: SAR 20; (b) NaCl water: SAR 40; (c)  $NaHCO_3$  water: SAR 20; and (d)  $NaHCO_3$  water: SAR 40. For each water quality, within each soil depth, the columns labeled with the same letter

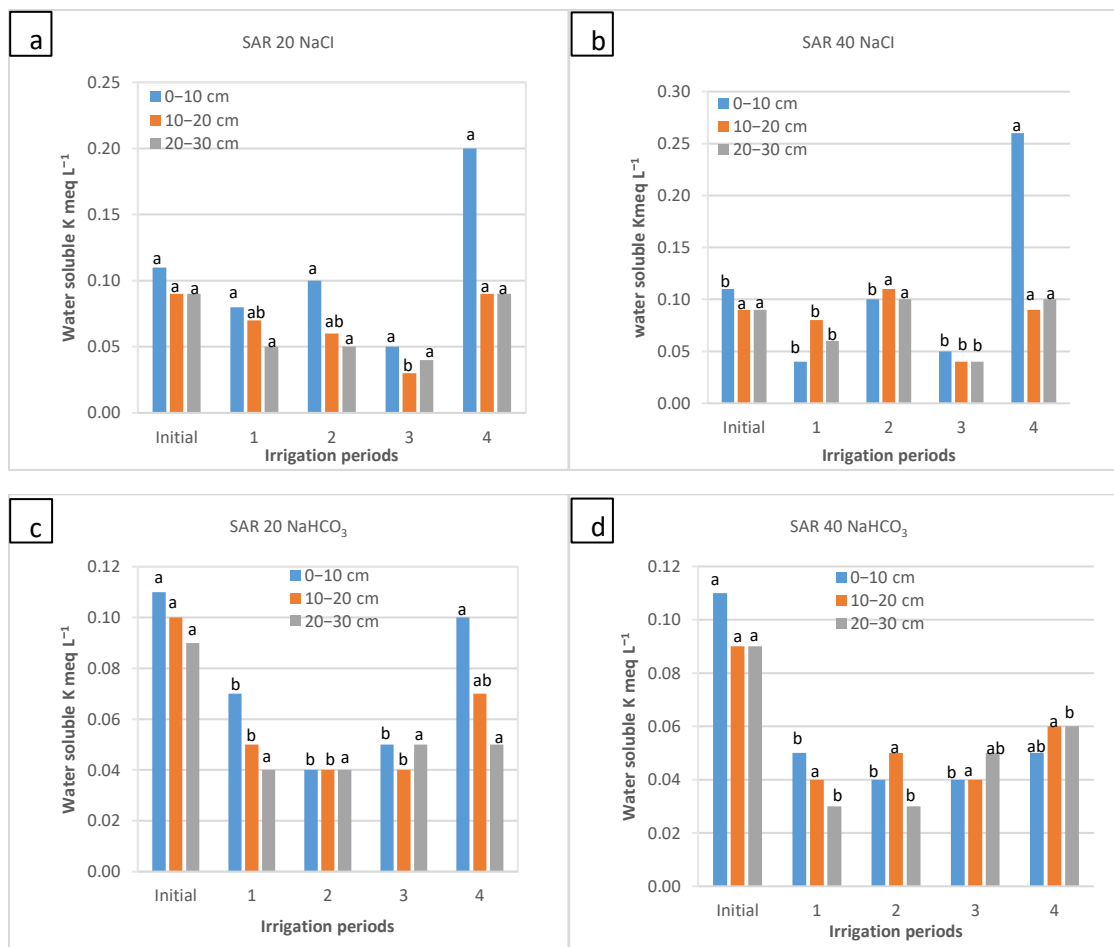

**Supplementary Figure 2.** Water-soluble K<sup>+</sup> of soil as a function of irrigation water applications during the irrigation periods (1, 2, and 4) and the rainy period (3) for four water qualities: (a) NaCl water: SAR 20; (b) NaCl water: SAR 40; (c) NaHCO<sub>3</sub> water: SAR 20; and (d) NaHCO<sub>3</sub> water: SAR 40. For each water quality, within each soil depth, the columns labeled with the same letter
